# Supplementary material for: Insights into Nitric Oxide-Mediated Water Balance, Antioxidant Defence and Mineral Homeostasis in Rice (<em>Oryza sativa L.</em>) under Chilling Stress
Source: Preprints.org preprint supplement (doi:10.20944/preprints202001.0153.v1), 2020-01-15
Supplement: Supplementary file 1 [file Supplimentary files.docx]

**Supplementary Files**

**Supplementary** **Figure 1.** Pearsoncorrelation matrix among all studied parameters. Blank squares indicate a non-significant correlation at 95% level of confidence.

**
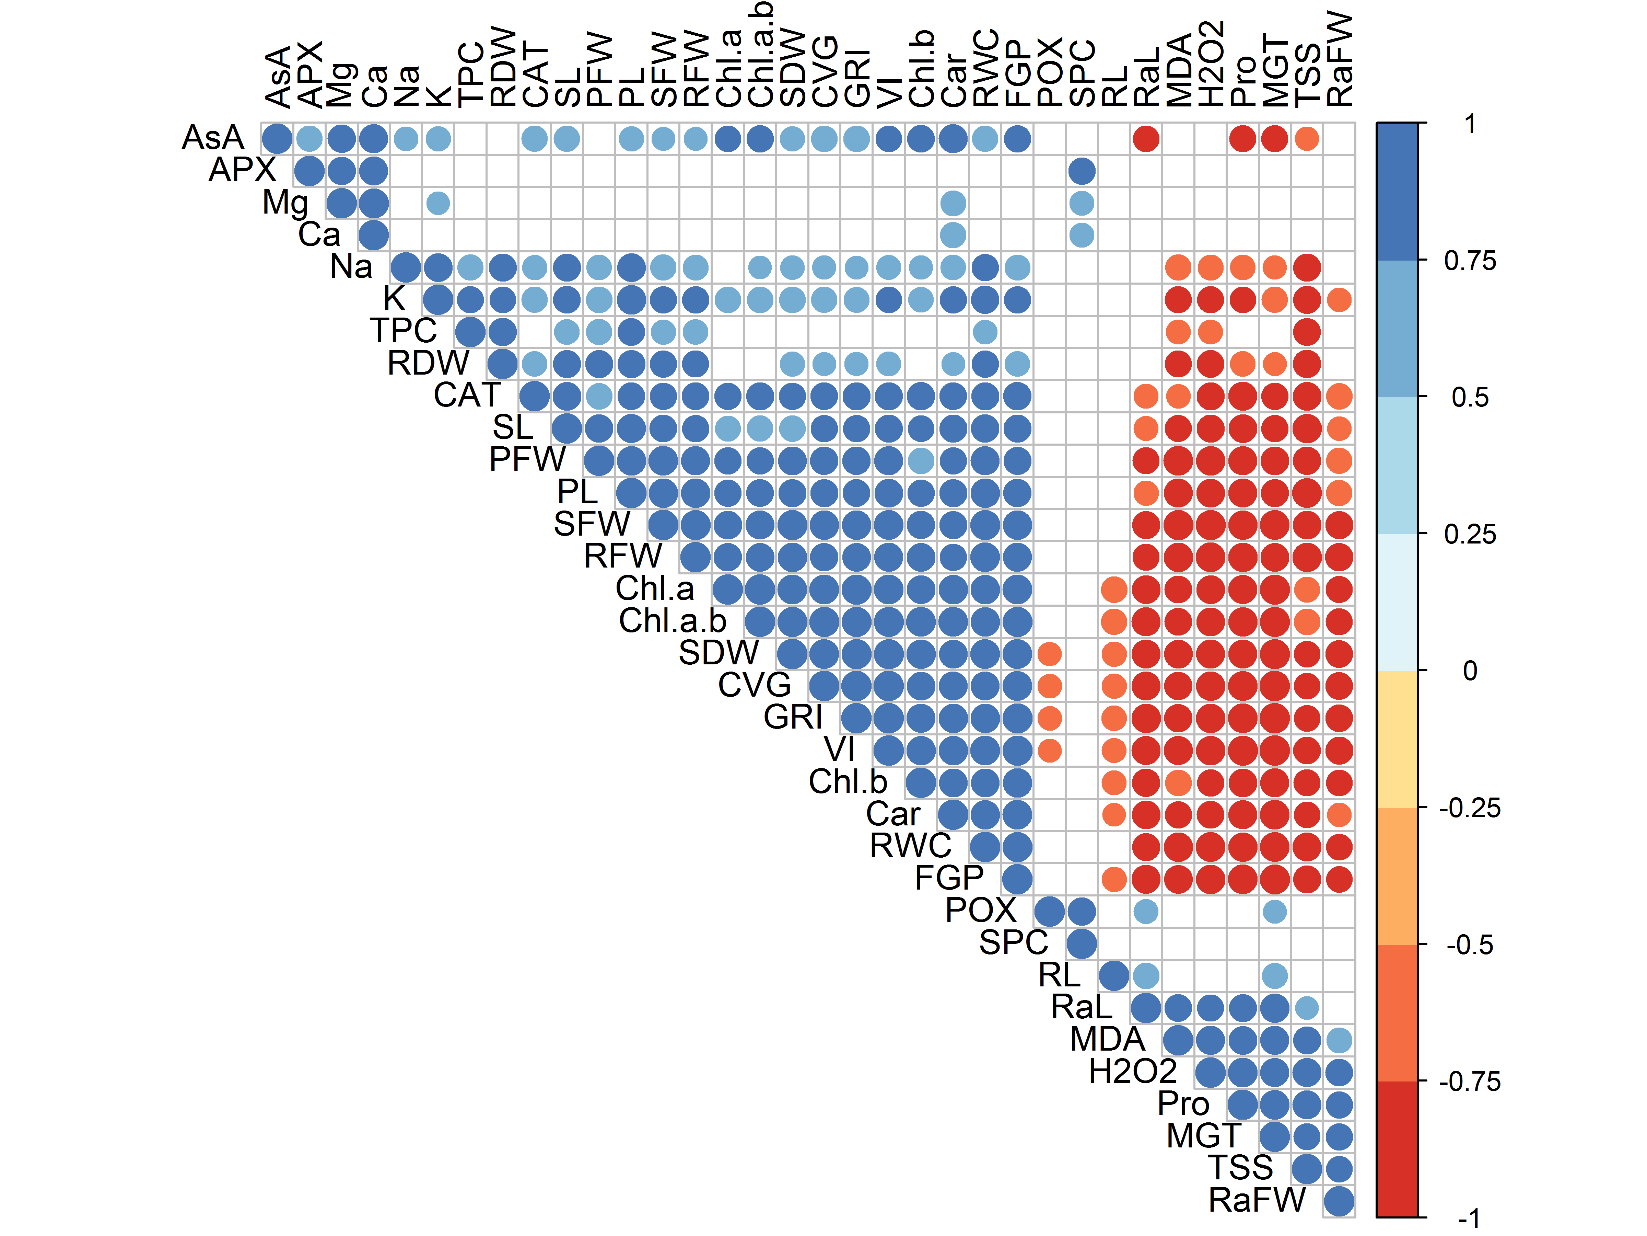
**

**Supplementary Table 1.** Coordinates or loadings for the parameters and contributions of different parameters to the components of PCA (PC1 and PC2)

**Smaller**

**Larger**

| **Variables** | **Coordinates for variables** | | **Contributions of variables** | |
| --- | --- | --- | --- | --- |
| **PC1** | **PC2** | **PC1** | **PC2** |
| CAT | 0.872 | 0.16 | 3.195 | 0.579 |
| APX | 0.309 | 0.876 | 0.401 | 17.201 |
| POX | -0.453 | 0.782 | 0.862 | 13.705 |
| MDA | -0.907 | 0.237 | 3.453 | 1.263 |
| H2O2 | -0.941 | 0.224 | 3.721 | 1.133 |
| Chl *a* | 0.934 | -0.035 | 3.659 | 0.027 |
| Chl *b* | 0.917 | 0.046 | 3.532 | 0.047 |
| Chl *a+b* | 0.954 | -0.012 | 3.818 | 0.003 |
| Car | 0.941 | 0.233 | 3.714 | 1.219 |
| AsA | 0.777 | 0.488 | 2.538 | 5.343 |
| Pro | -0.969 | 0.015 | 3.942 | 0.005 |
| TSS | -0.887 | -0.0731 | 3.301 | 0.119 |
| TPC | 0.593 | 0.009 | 1.477 | 0.001 |
| SPC | 0.034 | 0.937 | 0.004 | 19.698 |
| SL | 0.88 | 0.207 | 3.251 | 0.967 |
| RL | -0.579 | 0.196 | 1.408 | 0.863 |
| SDW | 0.951 | -0.203 | 3.798 | 0.926 |
| RDW | 0.738 | -0.09 | 2.286 | 0.182 |
| SFW | 0.962 | -0.233 | 3.885 | 1.226 |
| RFW | 0.94 | -0.171 | 3.709 | 0.656 |
| RWC | 0.981 | -0.0003 | 4.041 | 0 |
| Na | 0.753 | 0.259 | 2.384 | 1.505 |
| K | 0.84 | 0.27 | 2.964 | 1.644 |
| Mg | 0.485 | 0.779 | 0.989 | 13.611 |
| Ca | 0.514 | 0.776 | 1.109 | 13.495 |
| PL | 0.93 | 0.057 | 3.635 | 0.073 |
| RaL | -0.859 | 0.143 | 3.099 | 0.459 |
| PFW | 0.903 | -0.209 | 3.427 | 0.987 |
| RaFW | -0.795 | 0.276 | 2.656 | 1.712 |
| FGP | 0.981 | 0.01 | 4.036 | 0.002 |
| MGT | -0.968 | 0.104 | 3.935 | 0.245 |
| GRI | 0.961 | -0.133 | 3.881 | 0.399 |
| CVG | 0.956 | -0.137 | 3.838 | 0.423 |
| VI | 0.98 | -0.109 | 4.034 | 0.266 |

|  |
| --- |
|  |
|  |
|  |
|  |
|  |
|  |
|  |
|  |
|  |
|  |
|  |
|  |
|  |
|  |
|  |
|  |
|  |
|  |
|  |
|  |
